# Supplementary material
Source: PubMed Central journal article supplement (PMC8142810)
Supplement: NIHMS1698754-supplement-Tables_S1_-_3.pdf [file NIHMS1698754-supplement-Tables_S1_-_3.pdf]

| <b>Supplemental Table 1. Demographic and substance misuse characteristics for low-level users (N=16) meeting criteria for OUD excluded from the replication sample</b> |                    |
|------------------------------------------------------------------------------------------------------------------------------------------------------------------------|--------------------|
|                                                                                                                                                                        | <b>non-OUD</b>     |
| <b>Men (%)</b>                                                                                                                                                         | <b>62.5</b>        |
| <b>Women (%)</b>                                                                                                                                                       | <b>37.5</b>        |
| <b>Mean age (SD)</b>                                                                                                                                                   | <b>41.8 (11.2)</b> |
| <b>Ethnicity - African American (%)</b>                                                                                                                                | <b>25.0</b>        |
| <b>European American (%)</b>                                                                                                                                           | <b>75.0</b>        |
| <b>First opioid used – Heroin/opium (%)</b>                                                                                                                            | <b>6.2</b>         |
| <b>Other (%)</b>                                                                                                                                                       | <b>93.8</b>        |
| <b>Mean age first opioid misuse (SD)</b>                                                                                                                               | <b>23.1 (10.4)</b> |
| <b>Time (yrs) since first opioid misuse (SD)</b>                                                                                                                       | <b>18.7 (14.1)</b> |
| <b>Mean (SD) number of times misused opioids - lifetime</b>                                                                                                            | <b>38.1 (18.1)</b> |
| <b>Lifetime use and use disorders – other drugs</b>                                                                                                                    |                    |
| <b>Any cannabis misuse</b>                                                                                                                                             | <b>93.8</b>        |
| <b>Cannabis use disorder (%)</b>                                                                                                                                       | <b>62.5</b>        |
| <b>Any stimulant misuse (%)</b>                                                                                                                                        | <b>87.5</b>        |
| <b>Stimulant use disorder (%)</b>                                                                                                                                      | <b>50.0</b>        |
| <b>Any cocaine misuse (%)</b>                                                                                                                                          | <b>75.0</b>        |
| <b>Cocaine use disorder (%)</b>                                                                                                                                        | <b>43.8</b>        |
| <b>Any sedative misuse (%)</b>                                                                                                                                         | <b>87.5</b>        |
| <b>Sedative use disorder (%)</b>                                                                                                                                       | <b>31.2</b>        |

| <b>Supplemental Table 2. Subjective effects of initial opioid misuse endorsed by low-level users (N=16) meeting criteria for OUD excluded from the replication sample</b> |                      |                        |
|---------------------------------------------------------------------------------------------------------------------------------------------------------------------------|----------------------|------------------------|
| <b>Subjective Response Item</b>                                                                                                                                           | <b>ARCI scale(s)</b> | <b>Endorsement (%)</b> |
| My speech was slurred                                                                                                                                                     | P                    | 68.8                   |
| I had a feeling of just dragging along rather than coasting                                                                                                               | P                    | 75.0                   |
| I felt like avoiding people although I usually did not feel this way                                                                                                      | P                    | 81.2                   |
| It seemed harder than usual to move around                                                                                                                                | P                    | 50.0                   |
| I was moody                                                                                                                                                               | P                    | 75.0                   |
| People might have said that I was a little dull                                                                                                                           | P, B*                | 50.0                   |
| I felt dizzy                                                                                                                                                              | P                    | 68.8                   |
| Things around me seemed more pleasing than usual                                                                                                                          | M                    | 25.0                   |
| I felt drowsy                                                                                                                                                             | P, L*                | 18.8                   |
| I feared I would lose the contentment I had then                                                                                                                          | M                    | 56.2                   |
| I felt in complete harmony with the world and those about me                                                                                                              | M                    | 50.0                   |
| I could completely appreciate what others were saying when I was in that mood                                                                                             | M                    | 50.0                   |
| I would be happy all the time if I felt as I felt then                                                                                                                    | M                    | 43.8                   |
| I felt so good that I knew other people could tell it                                                                                                                     | M                    | 68.8                   |
| I felt as if something pleasant just happened to me                                                                                                                       | M                    | 37.5                   |
| I felt as if I would be more popular with people                                                                                                                          | A, M                 | 56.2                   |
| I felt a very pleasant emptiness                                                                                                                                          | A, M                 | 43.8                   |
| My thoughts came more easily than usual                                                                                                                                   | A, M, B              | 43.8                   |
| I felt less discouraged than usual                                                                                                                                        | A, M                 | 31.2                   |
| I felt more excited than dreamy                                                                                                                                           | P*, A                | 62.5                   |
| My memory seemed sharper to me than usual                                                                                                                                 | A, B                 | 75.0                   |

|                                                     |          |      |
|-----------------------------------------------------|----------|------|
| I felt as if I could write for hours                | A, B     | 81.2 |
| Some of my body parts were tingling                 | A, L, B  | 33.3 |
| I felt itchy                                        | ----     | 62.5 |
| My movements seemed faster than usual               | B        | 100  |
| My hands felt clumsy                                | L        | 68.8 |
| I noticed my hand shook when I tried to write       | L        | 86.7 |
| I had a disturbance in my stomach                   | L        | 62.5 |
| I felt anxious and upset                            | L        | 87.5 |
| I had unusual weakness of my muscles                | L        | 75.0 |
| A thrill had gone through me one or more times      | P*, L    | 43.8 |
| My movements were free, relaxed, and pleasurable    | L*       | 25.0 |
| I did not like the way the drug made me feel        | ----     | 87.5 |
| I was not as active as usual                        | P        | 31.2 |
| I felt sluggish                                     | P        | 43.8 |
| My head felt heavy                                  | P        | 62.5 |
| I was full of energy                                | P*       | 68.8 |
| I said things in the easiest possible way           | M        | 40.0 |
| I had a pleasant feeling in my stomach              | M        | 37.5 |
| I felt more clearheaded than dreamy                 | P*, M, B | 62.5 |
| I was in the mood to talk about the feelings I had  | M, B     | 62.5 |
| I felt very patient                                 | A, L*    | 31.2 |
| I had a weird feeling                               | A, L     | 43.8 |
| I had better control over myself than usual         | B        | 75.0 |
| My movements seemed slower than usual               | B*       | 18.8 |
| I found it hard to keep my mind on a task or job    | B*       | 56.2 |
| I didn't feel like reading anything then            | B*       | 31.2 |
| I felt an increasing awareness of bodily sensations | L        | 43.8 |

**\*Reverse coded in scale; P=Pentobarbital chlorpromazine alcohol group;  
A=Amphetamine group; M= Morphine Benzedrine group; L= Lysergic acid  
diethylamide group; B= Benzedrine group**

| <b>Supplemental Table 3. ARCI scale item mean scores for low-level misusers (N=16) meeting criteria for OUD excluded from the replication sample</b> |                    |
|------------------------------------------------------------------------------------------------------------------------------------------------------|--------------------|
| <b>Scale</b>                                                                                                                                         | <b>Mean (SD)</b>   |
| <b>Morphine Benzedrine group</b>                                                                                                                     | <b>0.527 (.29)</b> |
| <b>Pentobarbital chlorpromazine alcohol group</b>                                                                                                    | <b>0.475 (.26)</b> |
| <b>Amphetamine group</b>                                                                                                                             | <b>0.495 (.22)</b> |
| <b>Lysergic acid diethylamide group</b>                                                                                                              | <b>0.355 (.17)</b> |
| <b>Benzedrine group</b>                                                                                                                              | <b>0.350 (.24)</b> |
| <b>Items included in replication assessment – MBG 15; PCAG 15; AG 10; LSDG 12; BG 12</b>                                                             |                    |
